# Supplementary material for: A dynamic eco-evolutionary model predicts slow response of alpine plants to climate warming
Source: PubMed Central journal article supplement (PMC5424169; doi:10.1038/ncomms15399), 2017-05-05
Supplement: ncomms15399-s1.pdf [file ncomms15399-s1.pdf]

1

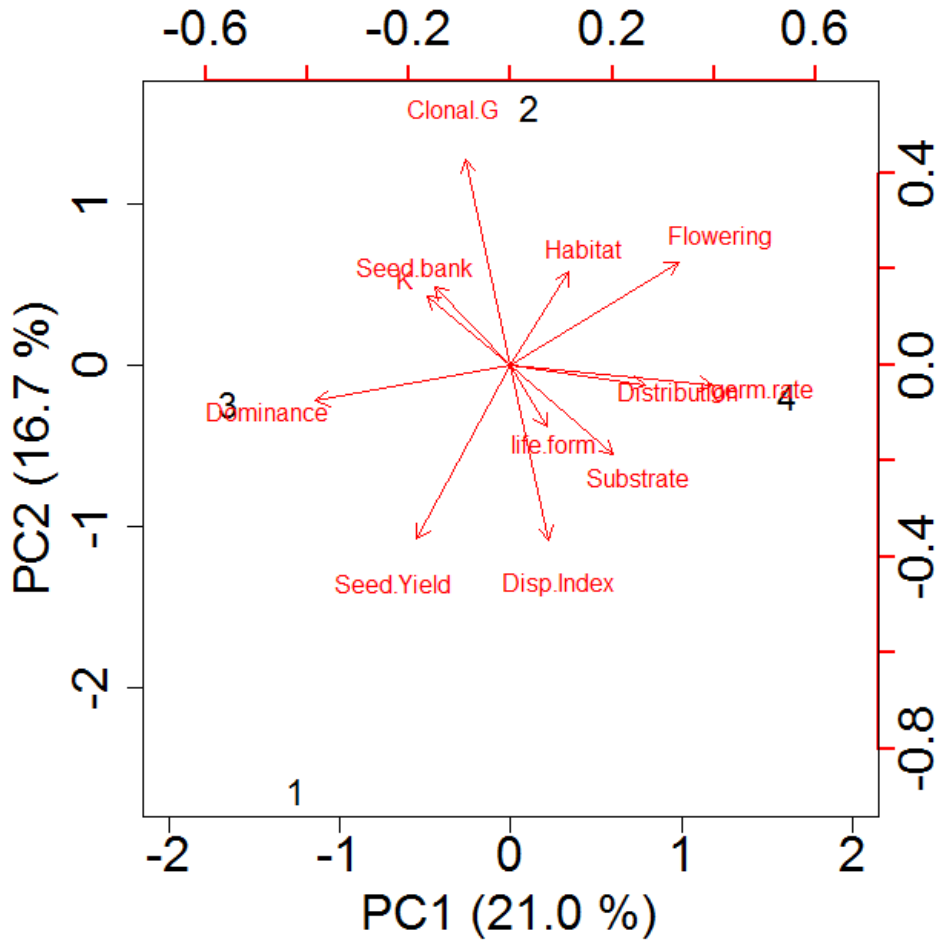

2

3 **Supplementary Figure 1:** Mapping of the selected species and factors along the first two

4 principal component axes. Red arrows correspond to the factors. 1: *Campanula pulla*, 2:

5 *Dianthus alpinus*, 3: *Festuca pseudodura*, 4: *Primula clusiana*.

6

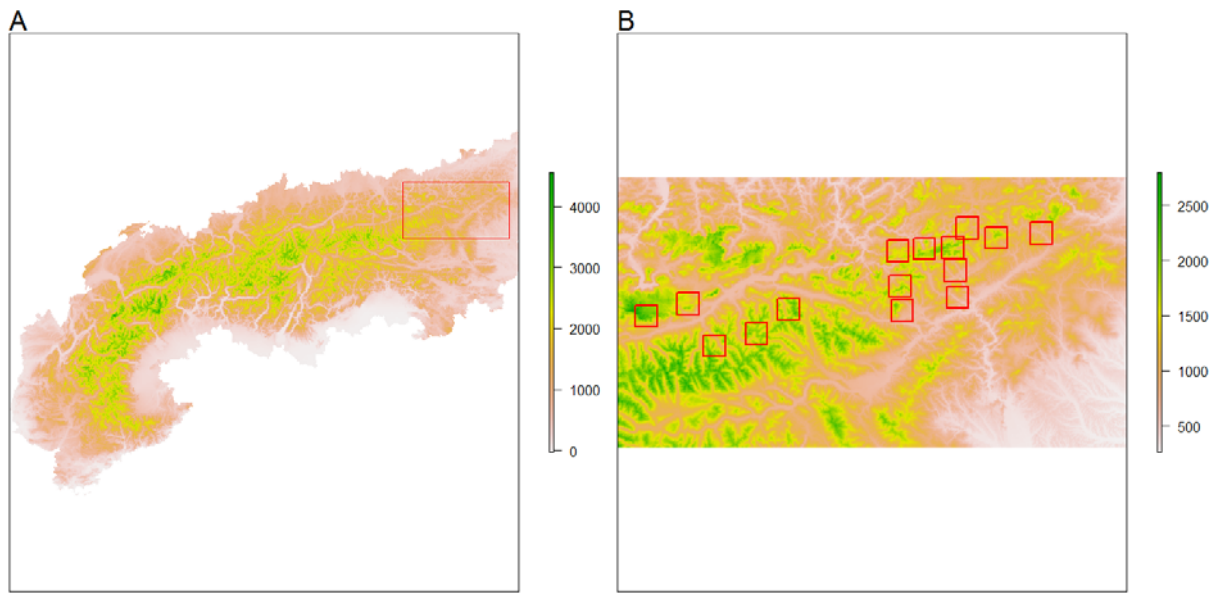

7

8 **Supplementary Figure 2:** A: Location of the study area within the Alps. B: Location of the  
9 studied grids (red boxes). The scale bar represents elevation above sea level in meters.

10

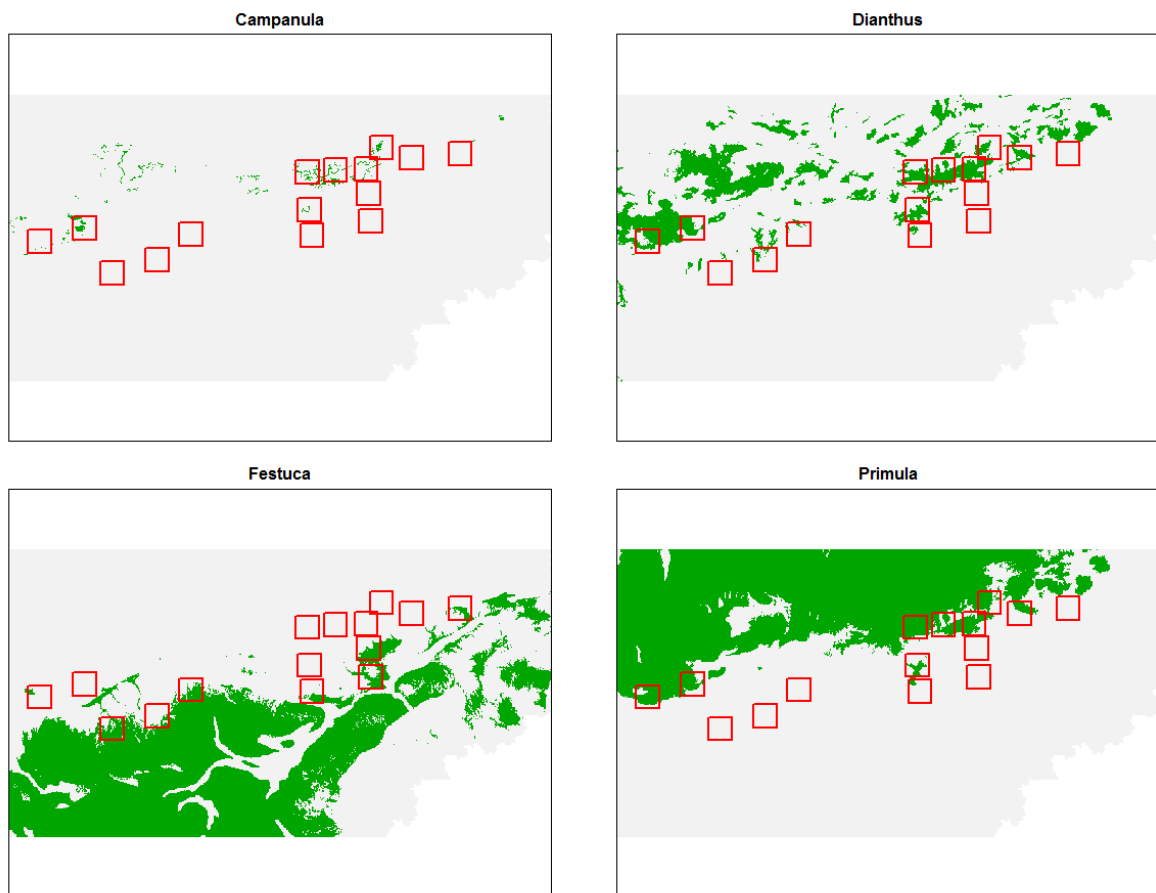

11

12 **Supplementary Figure 3:** Range (in green) of each species within the study area and location of  
 13 the selected grids (red boxes). Species presence is derived from SENM predictions on climate  
 14 (mean annual temperature and annual precipitation sum) averaged over the period 1950 -2000,  
 15 and a soil variable (percentage of carbonates in bedrock material).

16

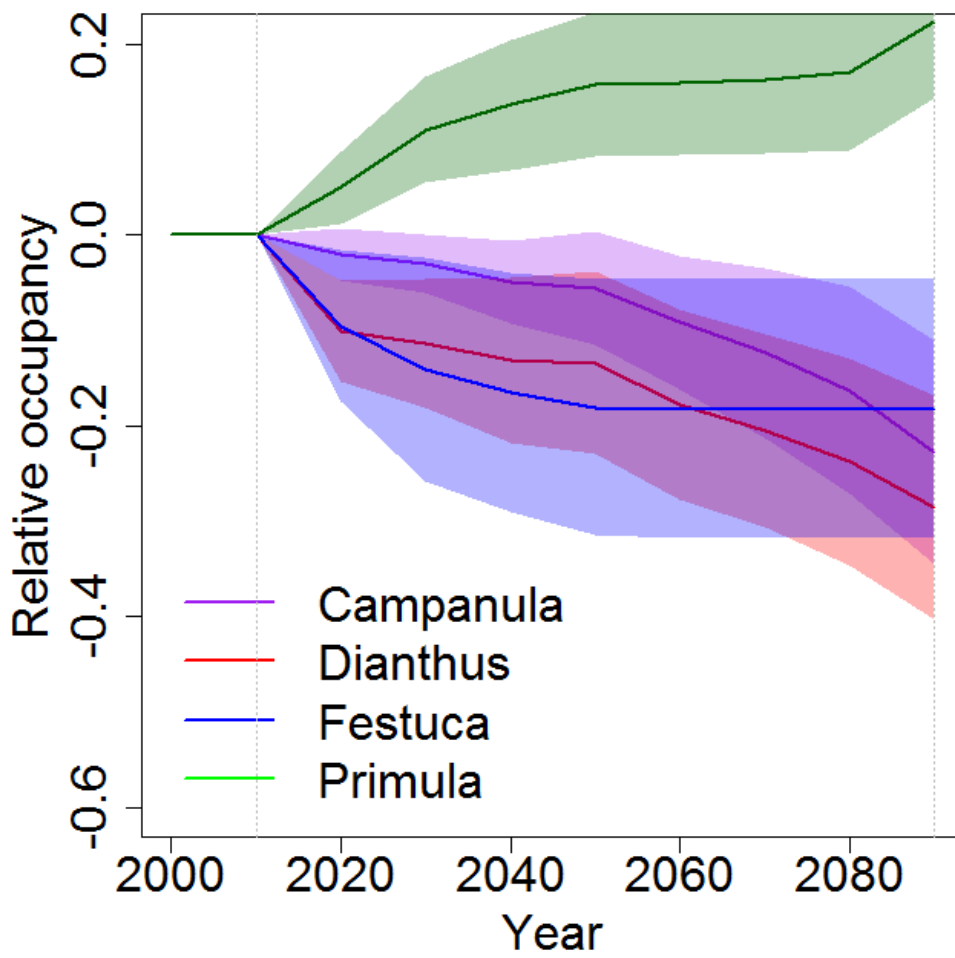

17

18 **Supplementary Figure 4:** Occupancy rate from the SENMs relative to initial occupancy (as  
 19 calculated in Fig. 1) as a function of time and species. Lines: mean over grids and climatic  
 20 scenarios, colored areas: standard deviations.

21

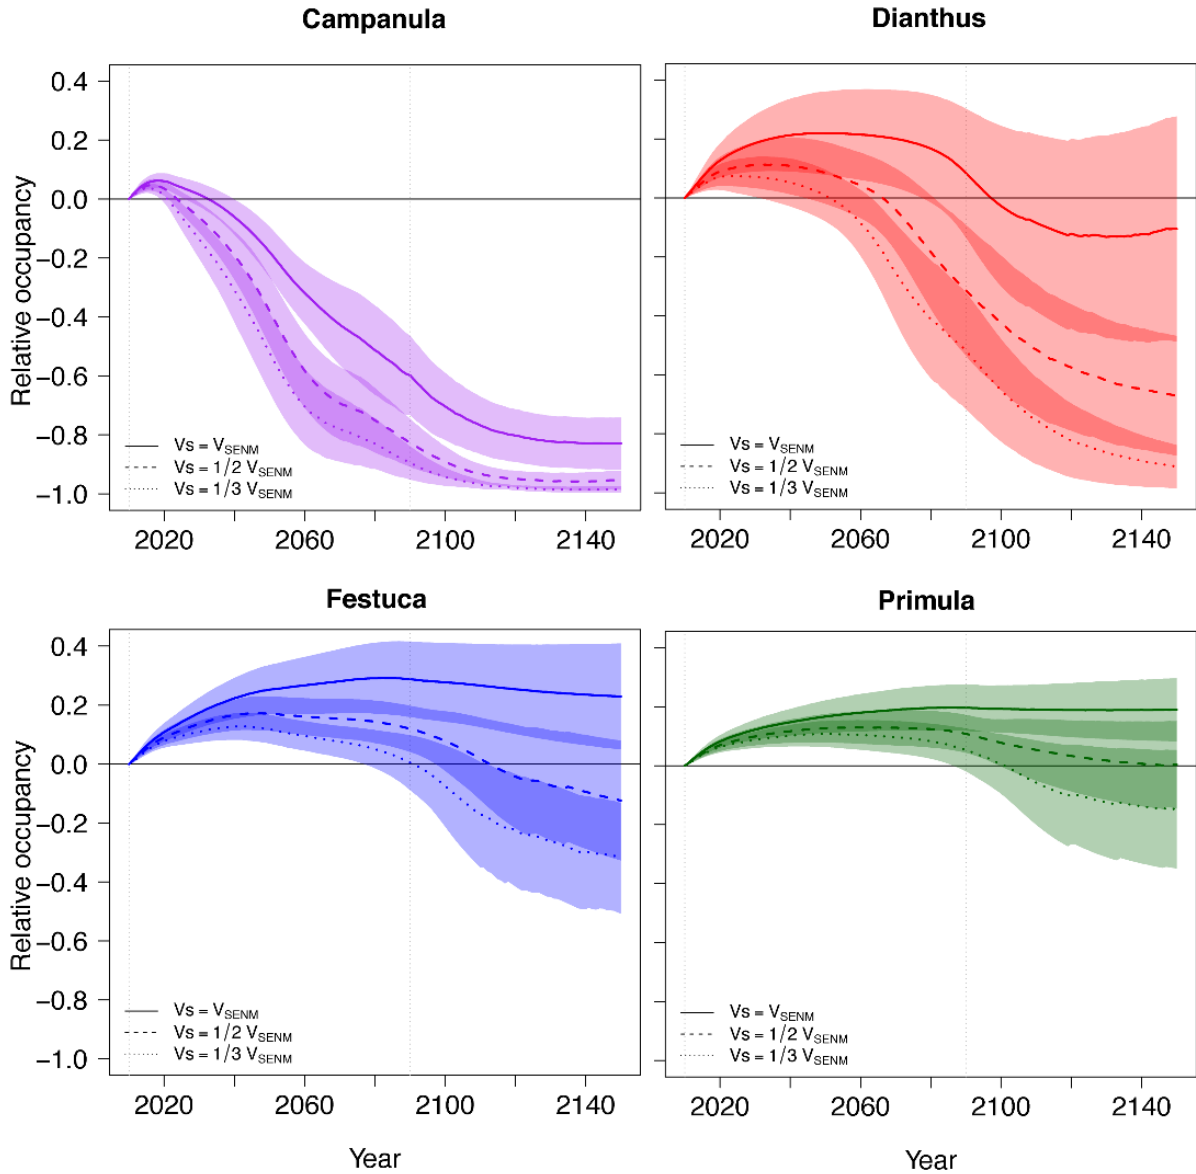

22

23 **Supplementary Figure 5:** Occupancy rate relative to occupancy in 2010 as a function of time  
 24 and strength of natural selection. Occupancy is calculated as in Fig. 1.  $V_s$  is measured in  
 25 proportion of the variance  $V_{SENM}$  of the current niche, i.e. the variance in the range of values of  
 26 each environmental variable among the sites classified as suitable to the species by the SENMs.  
 27 The lower  $V_s$  is, the stronger the stabilizing selection (equation 2). Lines: mean over all  
 28 simulations, colored areas: standard deviation.

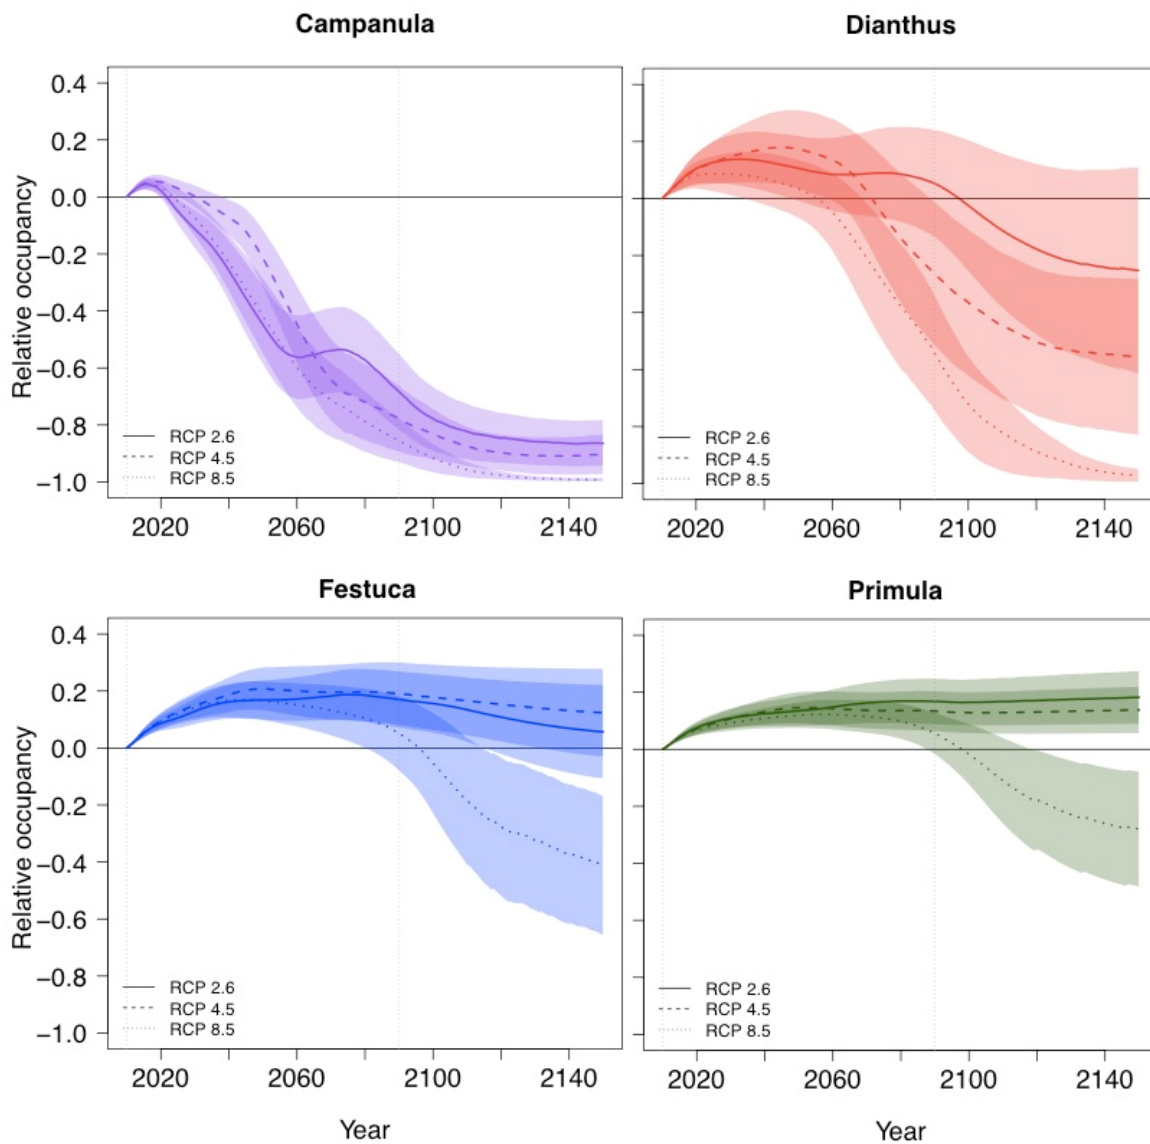

29

30 **Supplementary Figure 6:** Occupancy rate relative to occupancy in 2010 as a function of time  
 31 and RCP scenarios. Occupancy is calculated as in Fig. 1. Lines: mean over all simulations,  
 32 colored areas: standard deviation.

33

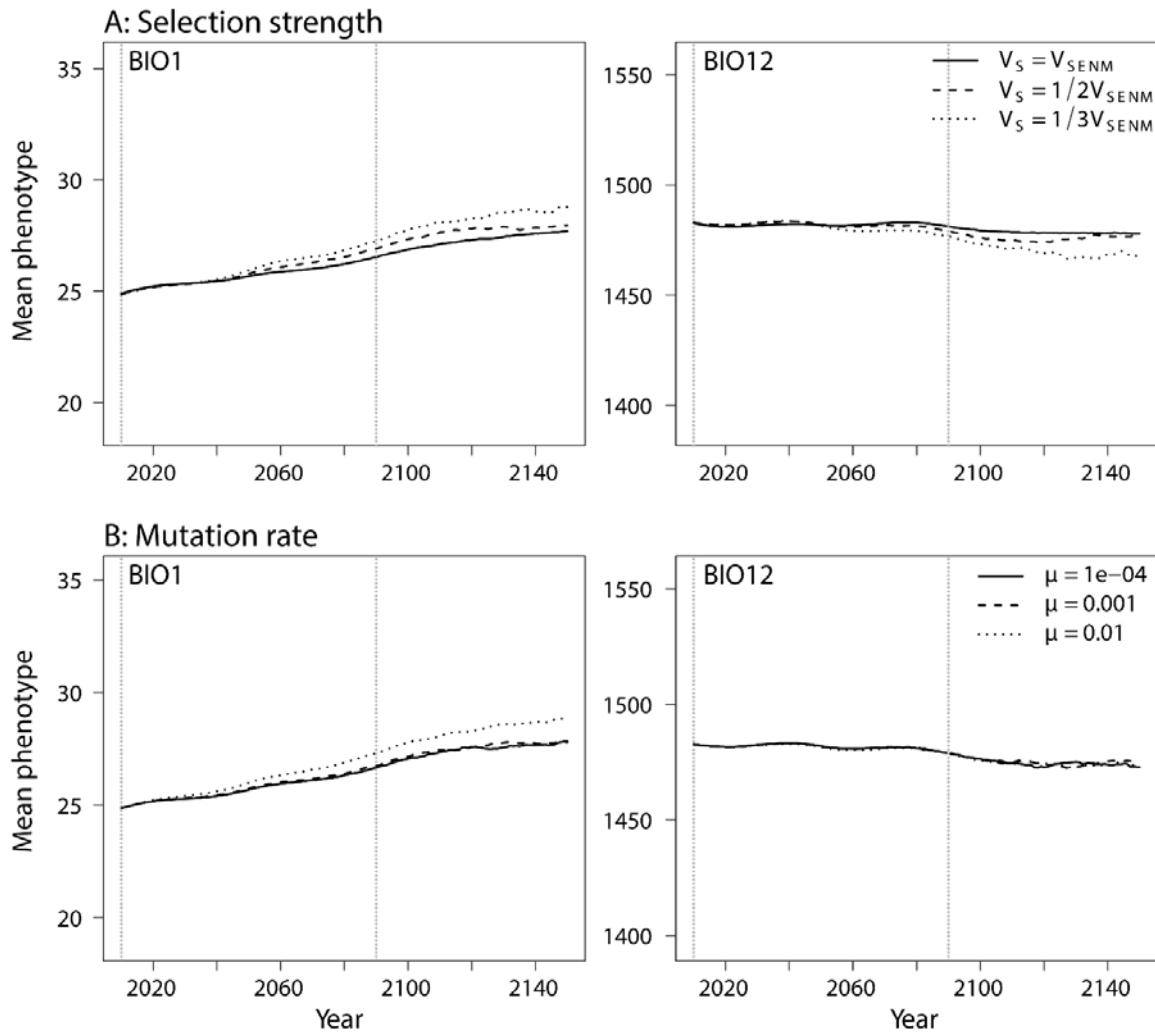

34

35 **Supplementary Figure 7:** Change in the mean trait values corresponding to the climatic  
 36 variables Bio1(mean annual temperature) and Bio 12 (annual precipitation sum) as a function of  
 37 time.

38

39

40

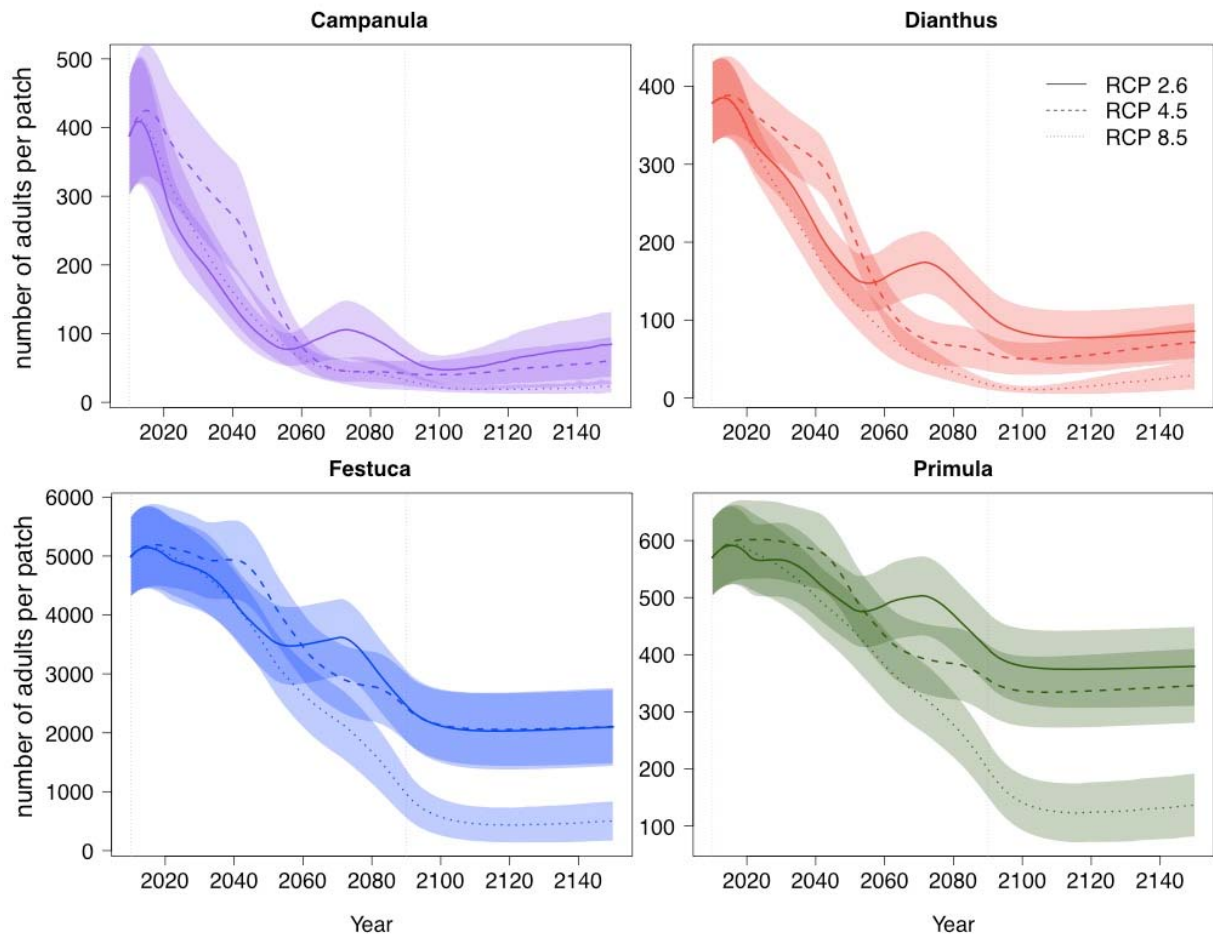

41

42 **Supplementary Figure 8:** Variation of population size of occupied sites between 2010 and 2150

43 for the three RCP scenarios. Lines are changes in population sizes averaged over all grids and

44 evolutionary parameters in each species. Colored areas: standard deviation.

45



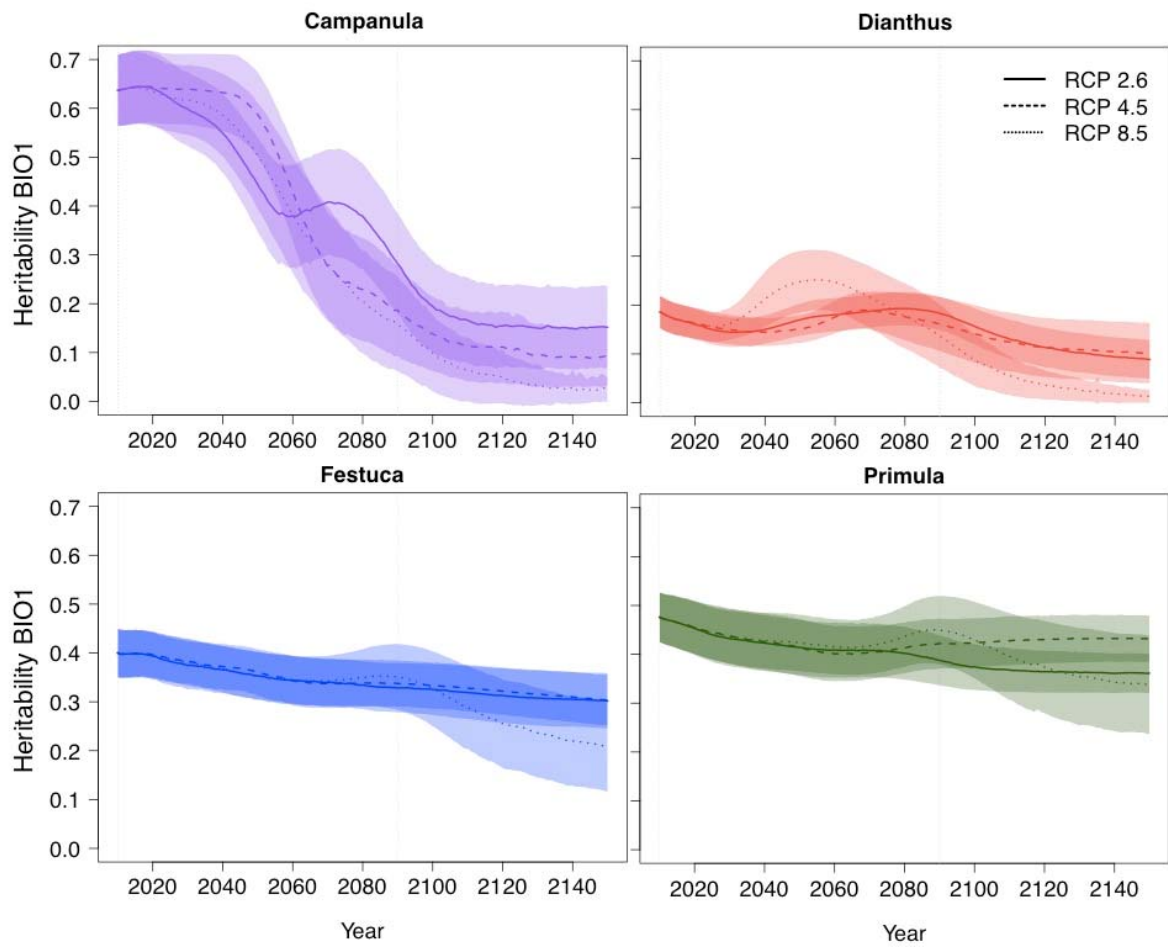

46

47 **Supplementary Figure 9:** Variation of trait (narrow-sense) heritability over time in each species

48 for each RCP scenario for Bio 1 (mean annual temperature).

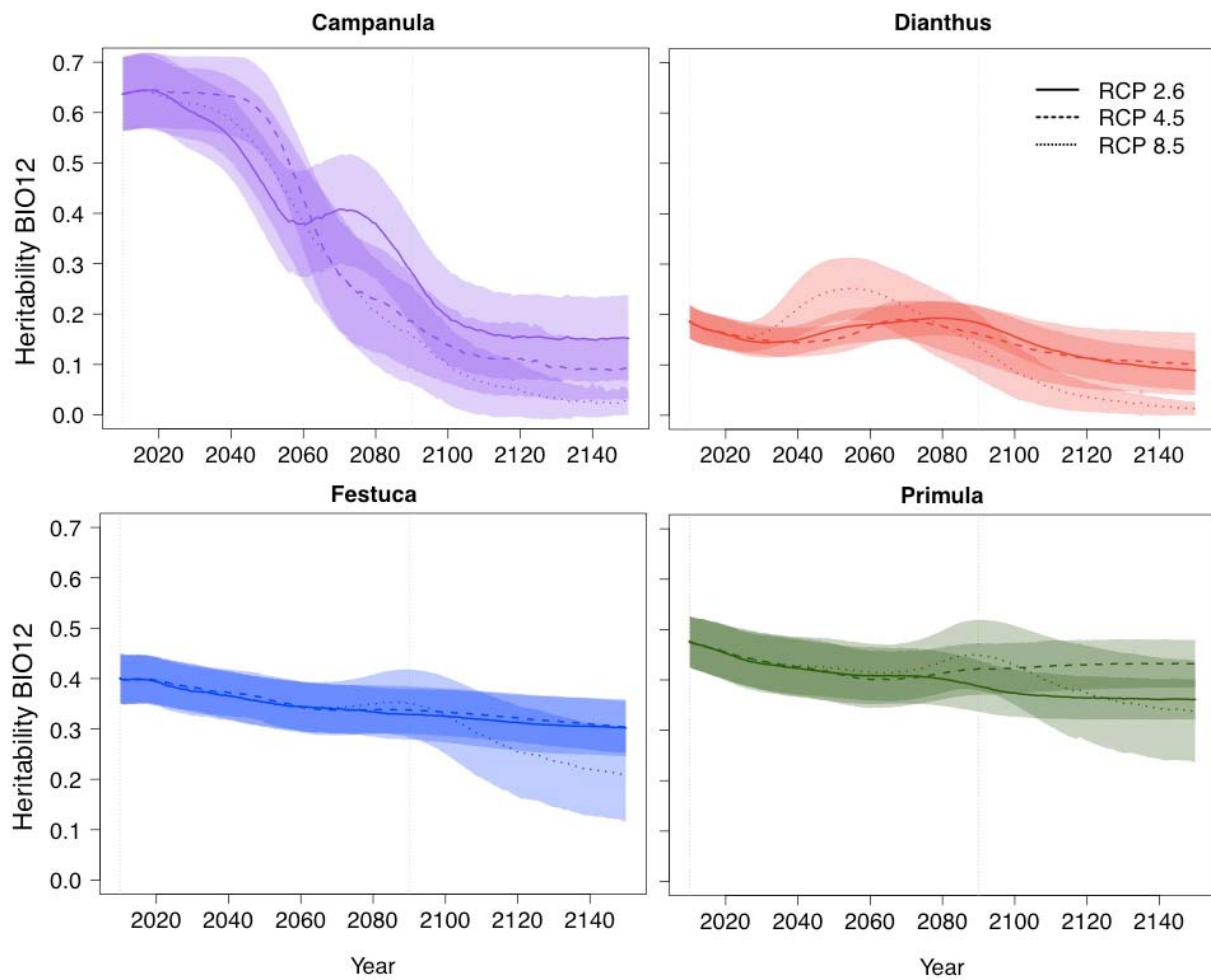

49

50 **Supplementary Figure 10:** Variation of trait (narrow sense) heritability over time in each

51 species for each RCP scenario for Bio 12 (annual precipitation sum).

52

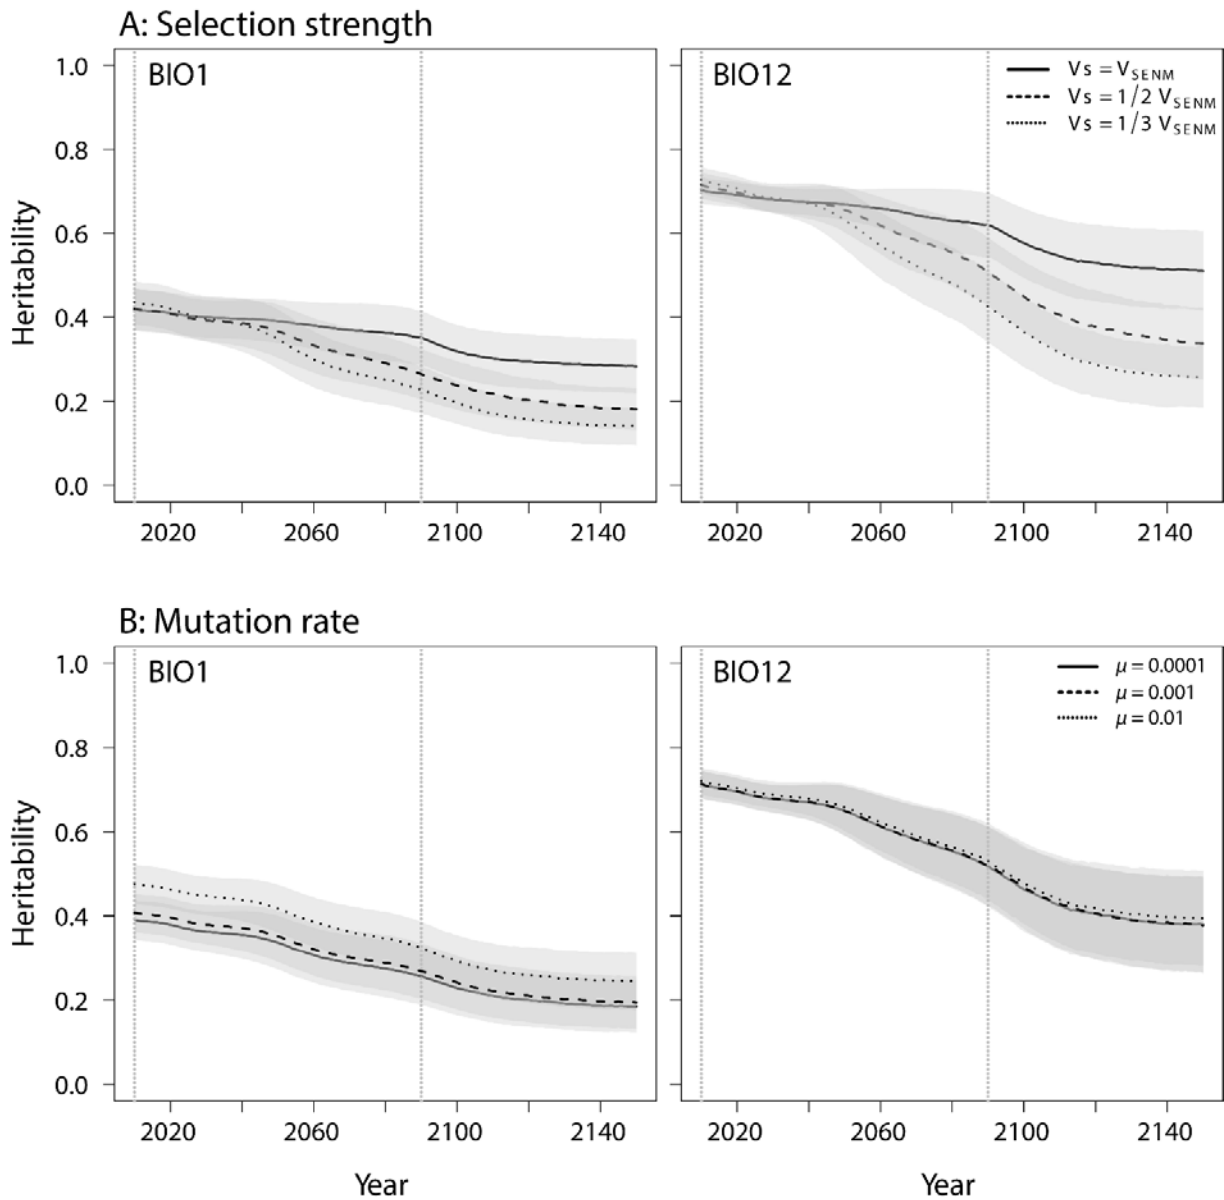

53

54 **Supplementary Figure 11:** Change in the mean heritability (narrow sense) for the traits  
 55 corresponding to Bio 1 (mean annual temperature) and Bio 12 (annual precipitation sum) as a  
 56 function of time.

57

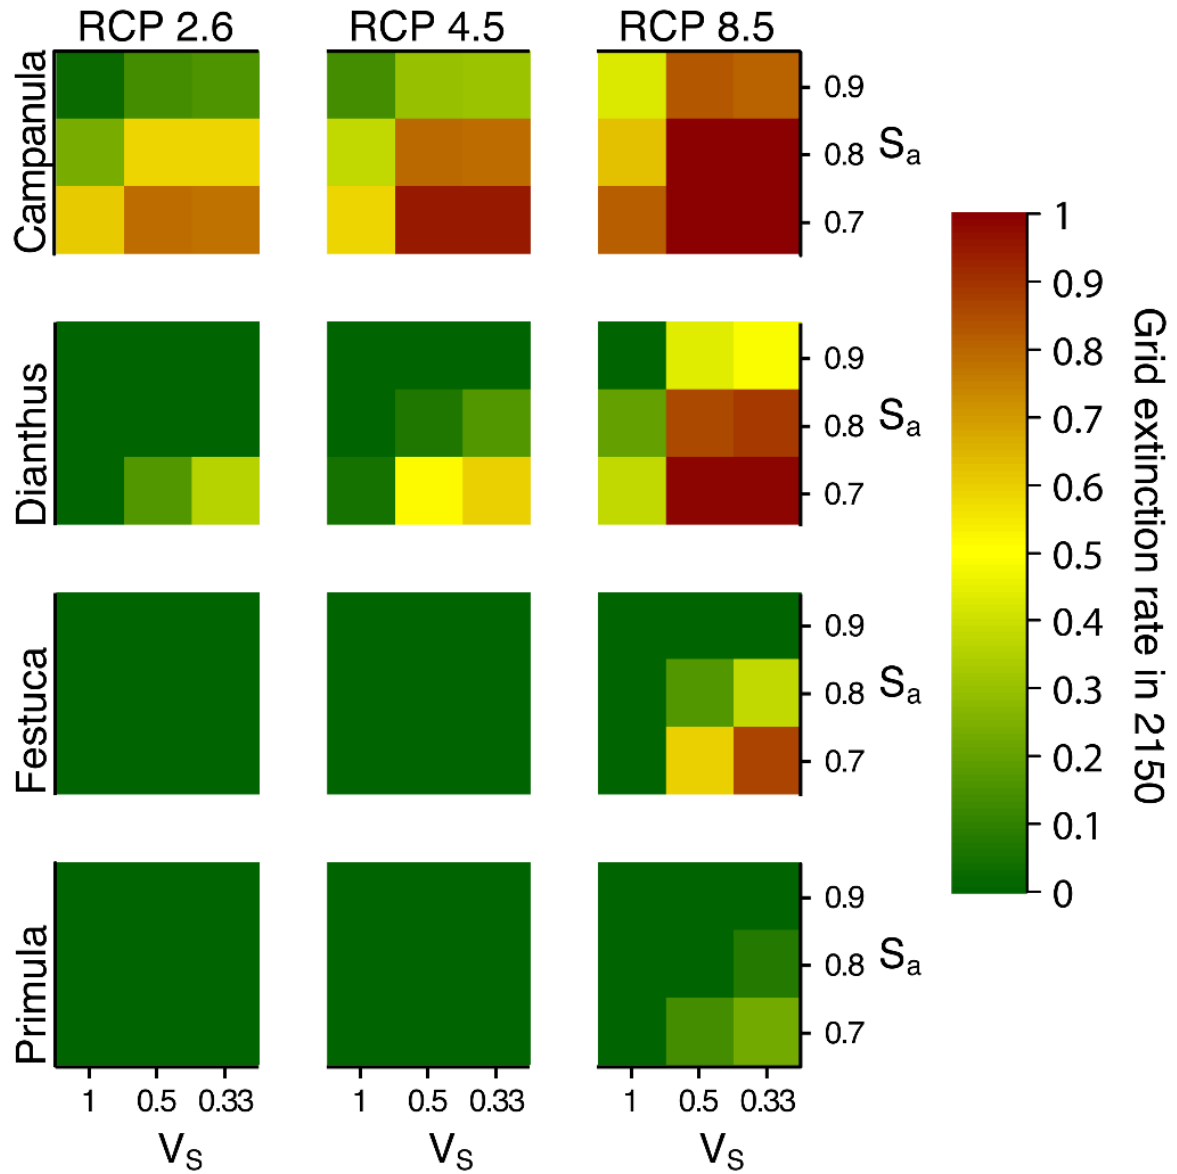

58

59 **Supplementary Figure 12:** Rate of grid extinction in 2150 (proportion of replicates that were  
 60 extinct in 2150) split per species, selection strengths and adult survival rates. Each cell is the  
 61 average over all grids and mutation rates.

62

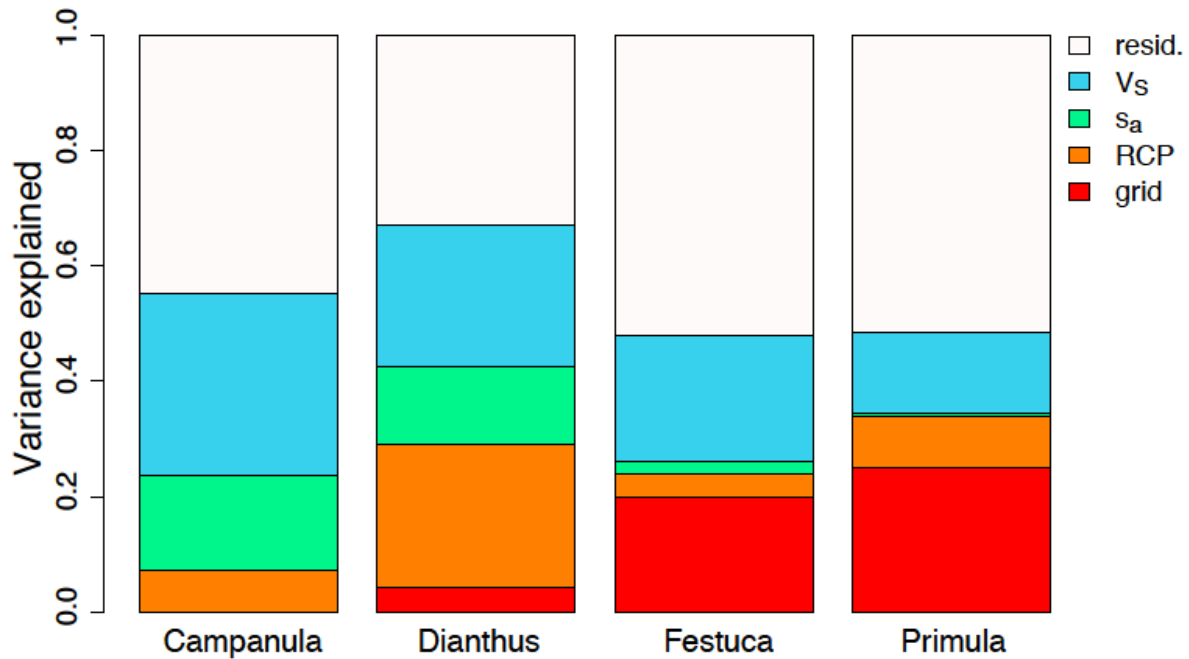

63

64 **Supplementary Figure 13:** Sensitivity analysis of the factors most affecting the variation in  
 65 relative range size between 2010 and 2090, separately for each species. Only parameters  
 66 explaining more than 2% of the variance in range size are illustrated. Residual variance ('resid.')

67 is contributed by random variation among replicated simulations owing to stochasticity, and  
 68 unaccounted factor interactions (all below 7% of variance explained, results not shown).

69 Variation contributed by changing the mutation rate is too low to be represented. Variables  
 70 included are: strength of selection ( $V_S$ ), adult survival ( $s_a$ ), climate change scenario (RCP), and  
 71 simulated landscapes (grid).

72

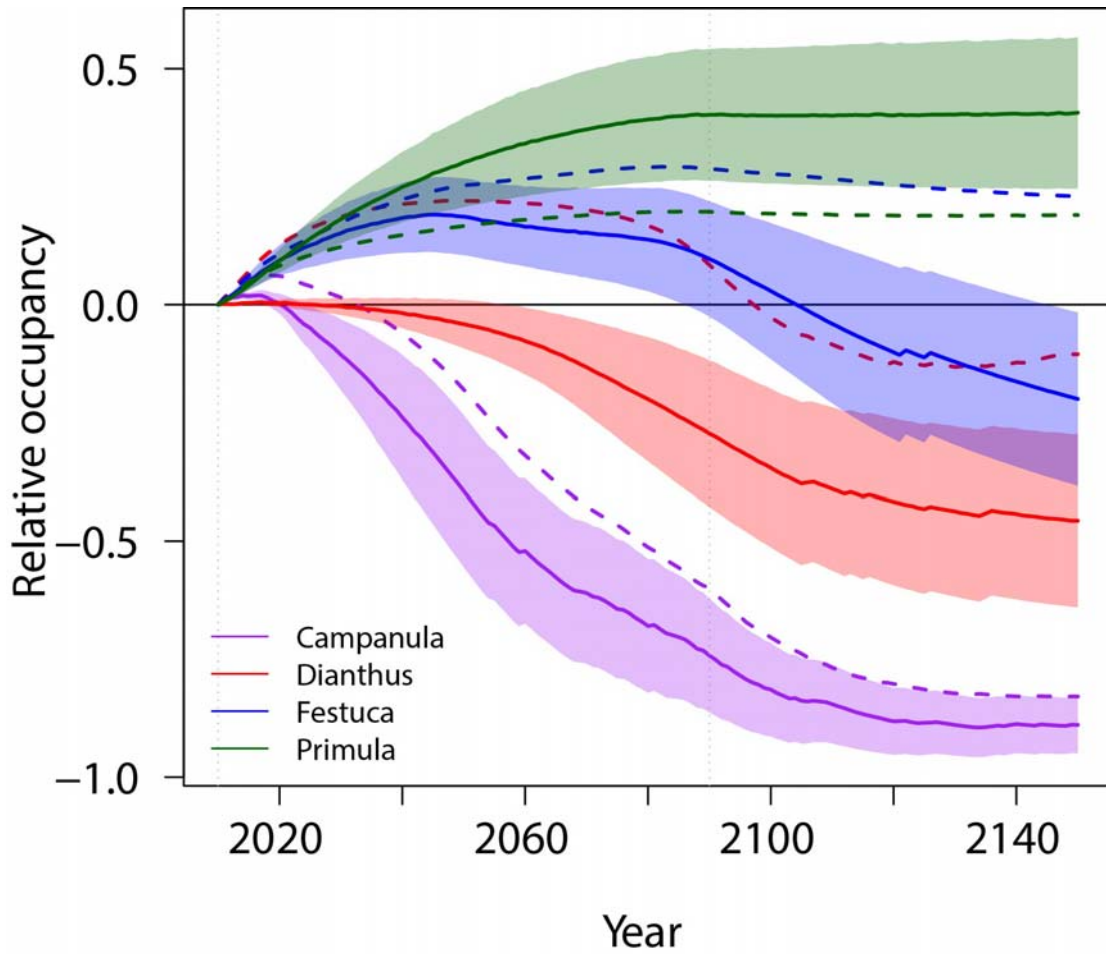

73

74 **Supplementary Figure 14:** Occupancy relative to the initial occupancy (as calculated in Fig. 1)  
 75 as a function of time when considering a single globally adapted genotype. Line: mean over all  
 76 grids, scenarios, species and replicates; dashed line: overall mean with local adaptation; colored  
 77 areas: standard deviations.  $V_S = V_{SENM}$ .

78

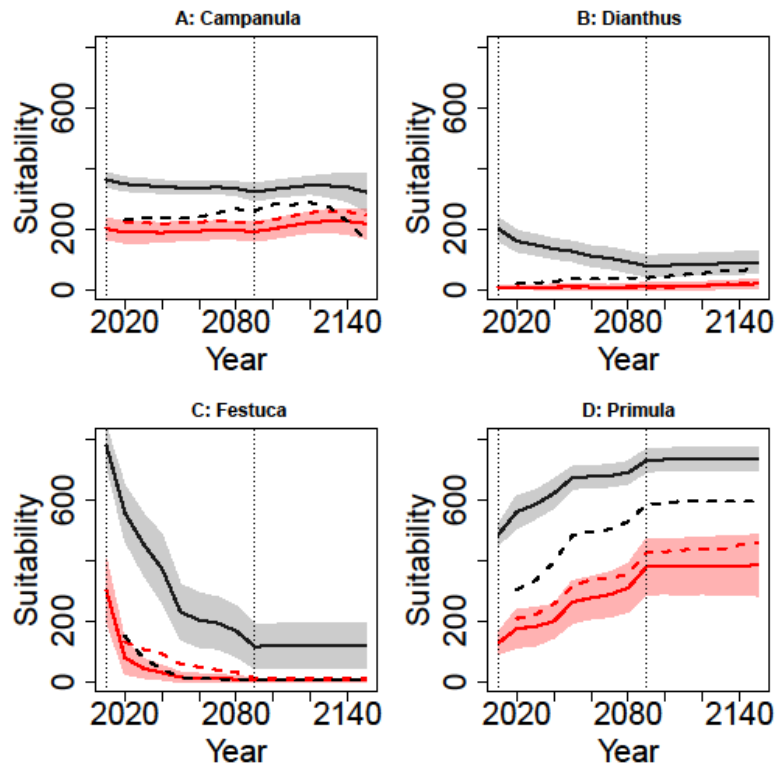

79

80 **Supplementary Figure 15:** Mean suitability (i.e. probability of presence x1000) predicted by the  
 81 SENMs in the sites occupied (solid black line) and unoccupied in the DEEMs (solid red line).  
 82 The dashed lines show the suitability in the sites colonized (black) and extinct (red) relative to  
 83 the population state in 2010. Colored areas: standard deviations.

84

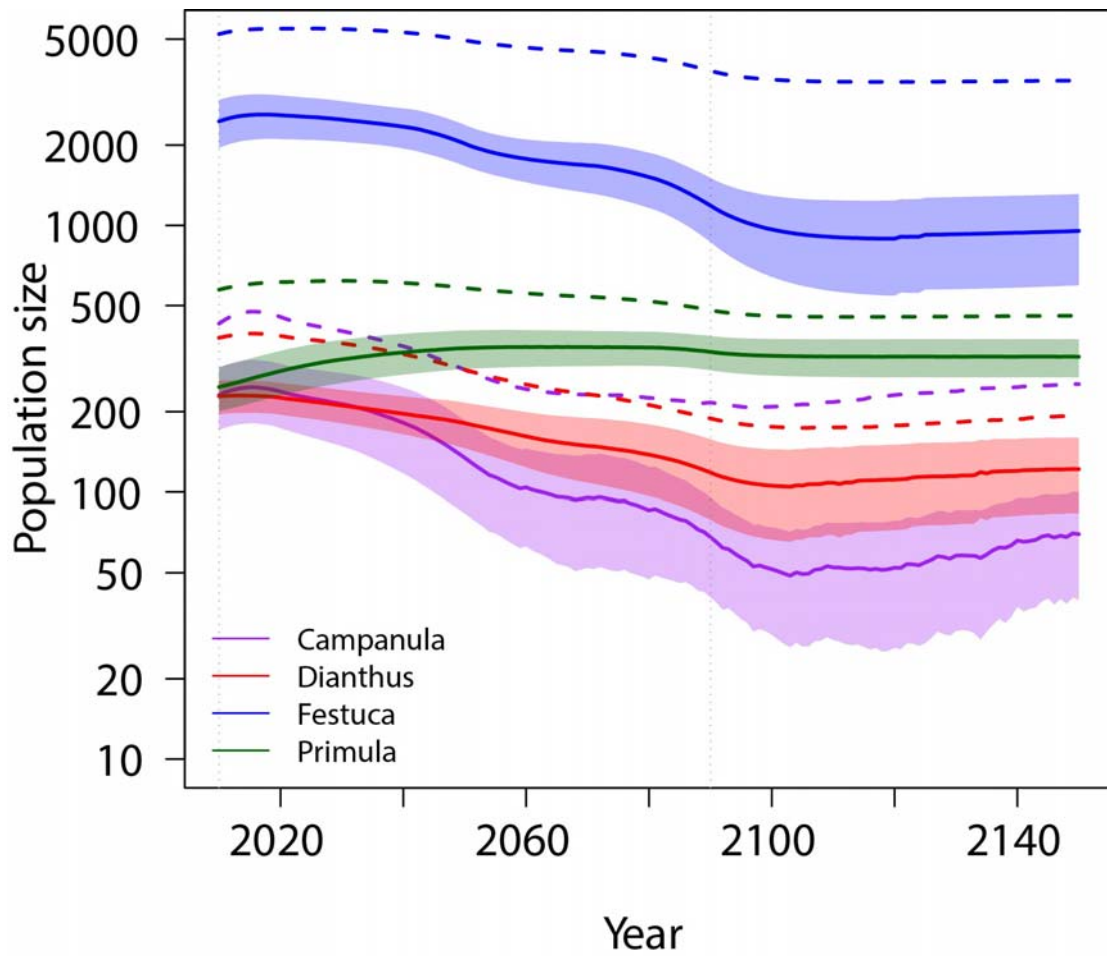

85

86 **Supplementary Figure 16:** Mean local population size as a function of time when considering a  
 87 single globally adapted genotype. Lines: means over all grids, scenarios, species and replicates;  
 88 dashed lines: overall means with local adaptation; colored areas: standard deviation.  $V_S = V_{SENM}$ .

89



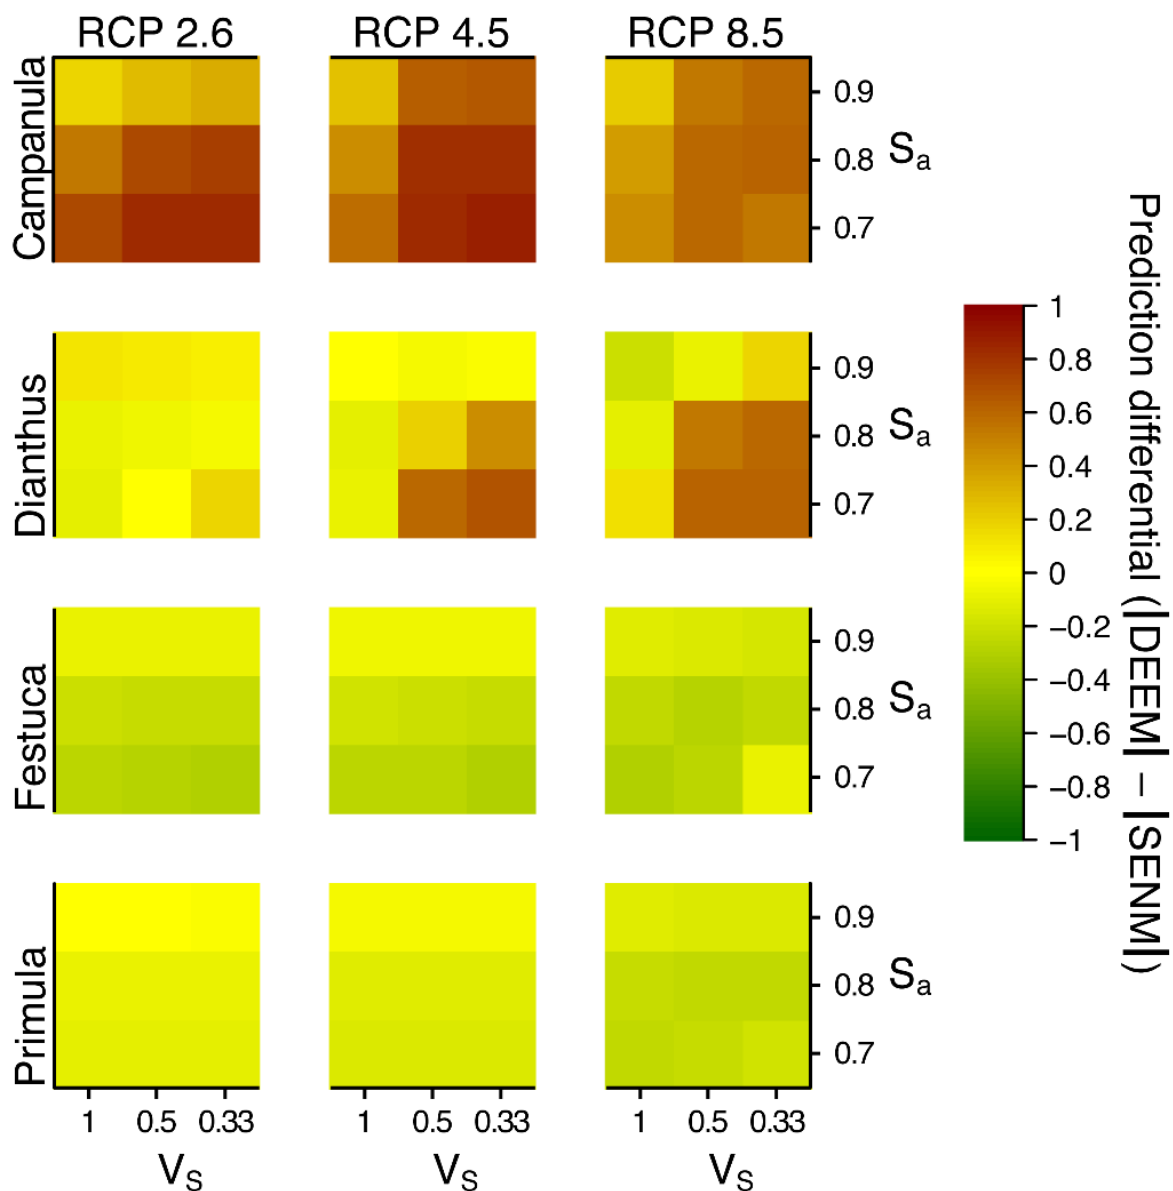

90

91 **Supplementary Figure 17:** Mean difference in relative occupancy in the year 2090 (as  
 92 calculated in Figure 1) as predicted by DEEMs (over all grids, climate scenarios, and mutation  
 93 rates) and SENMs (over all grids and climate scenarios), respectively. Positive values (warmer  
 94 colours) indicate a larger absolute change of species' range in DEEMs compared to SENMs (i.e.,  
 95 does not inform on whether the predicted species' range expands or shrinks).

96

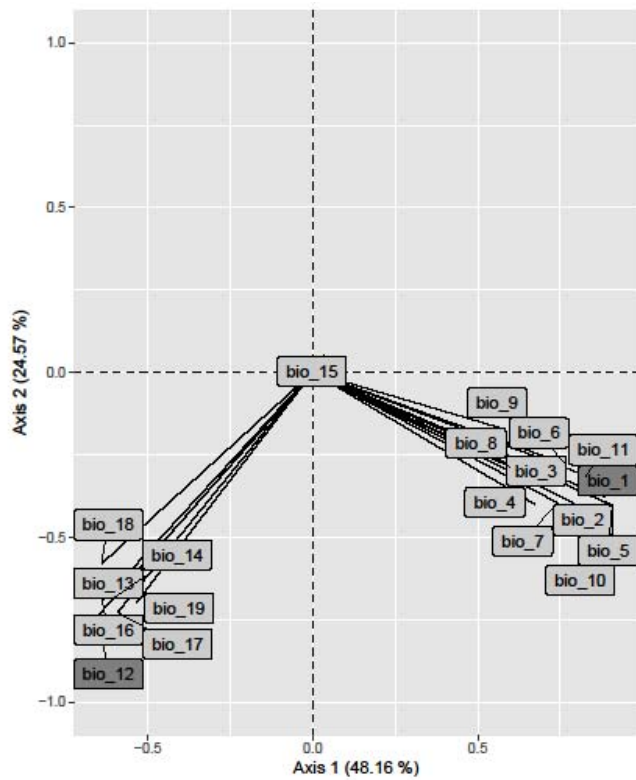

97

98 **Supplementary Figure 18:** PCA analysis on bioclimatic variables. Bioclimatic variables are

99 from <http://www.worldclim.org/bioclim>. The bioclimatic variables used in this study (Bio 1 and

100 Bio 12) are in dark-grey boxes.

101

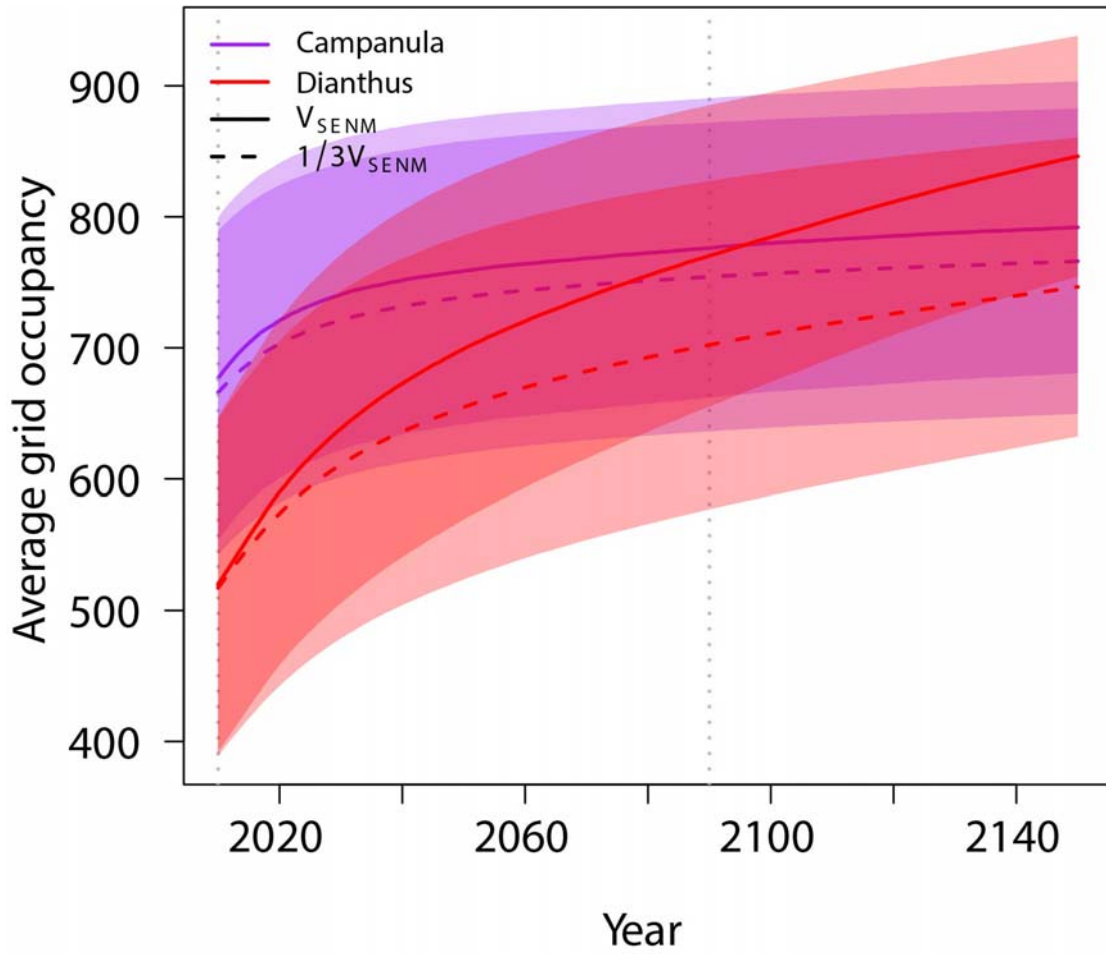

102

103 **Supplementary Figure 19:** Average grid occupancy (number of patches occupied per grid) of  
 104 *Campanula* and *Dianthus* for two strengths of selection (100% and 33% of  $V_{SENM}$ ) under the  
 105 assumption of selection on adult fecundity (seed production).

106

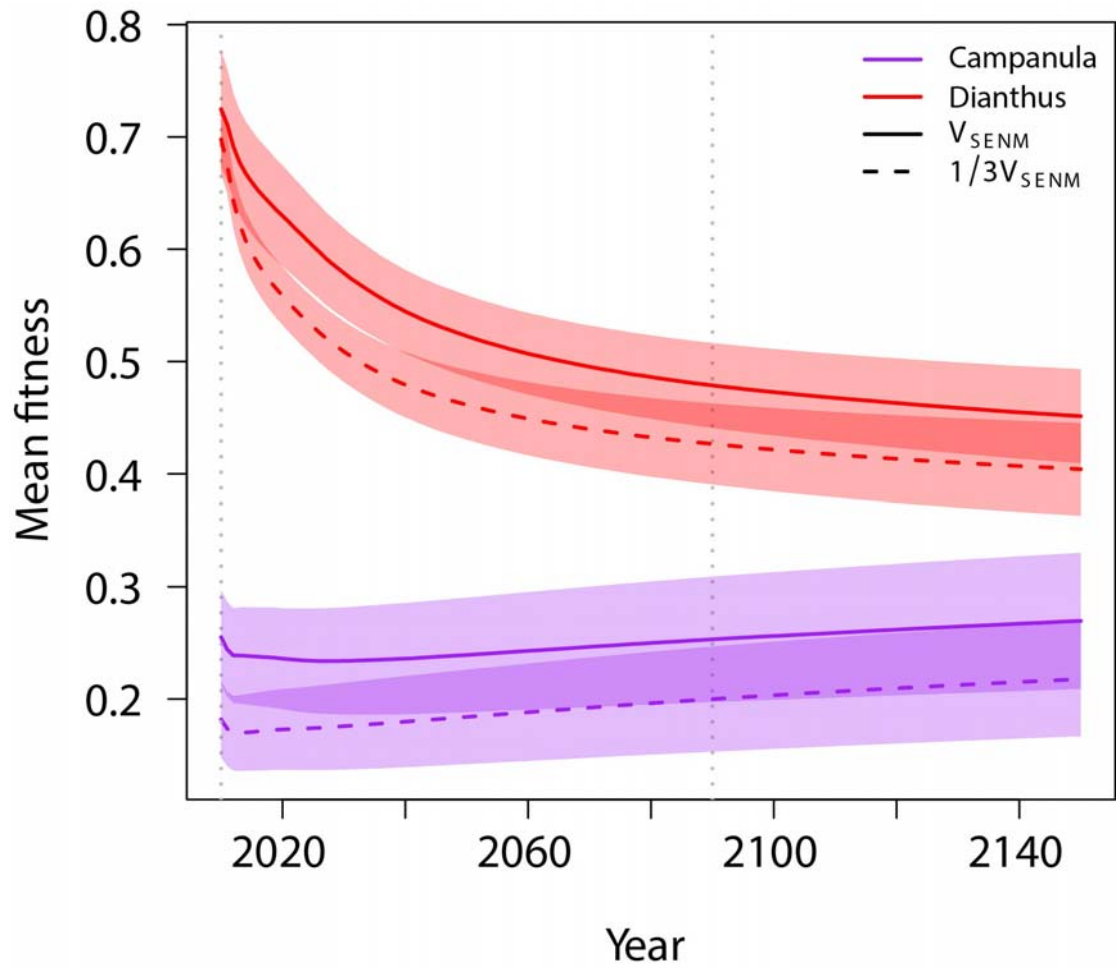

107

108 **Supplementary Figure 20:** Mean patch fitness (as given by equation 2) when selection is acting  
 109 on adult fecundity in *Campanula* and *Dianthus* for two strengths of selection (100% and 33% of  
 110  $V_{SENM}$ ).

111

112 **SUPPLEMENTARY METHODS**

113 *Properties of the species' niche*

114 **Supplementary Table 1:** Mean and variance (over all study landscapes = grids) of the  
 115 environment in the sites that the SENMs predicted to be occupied by the four species. These  
 116 statistics provide an overview of the current species niche in the parameter space defined by the  
 117 three environmental variables used in this study (see Methods). We assumed that the variance in  
 118 the environment occupied represents the lowest selection variance possible.

|                           | Bio 1 (°C x 10) |                               | Bio 12 (mm) |                               | Carbonate (%) |                               |
|---------------------------|-----------------|-------------------------------|-------------|-------------------------------|---------------|-------------------------------|
|                           | Mean            | Variance (V <sub>SENM</sub> ) | Mean        | Variance (V <sub>SENM</sub> ) | Mean          | Variance (V <sub>SENM</sub> ) |
| <i>Campanula pulla</i>    | 26.9            | 15.2                          | 1552.5      | 8179                          | 63.3          | 37.9                          |
| <i>Dianthus alpinus</i>   | 19.3            | 110.4                         | 1743.1      | 36591                         | 75.6          | 756.2                         |
| <i>Festuca pseudodura</i> | 36.3            | 459.2                         | 978.5       | 36031                         | 0.2           | 8.7                           |
| <i>Primula clusiana</i>   | 46.9            | 449.9                         | 1617.3      | 61647                         | 90.2          | 353.8                         |

119

120 **Supplementary Table 2:** Environmental variances used to adjust heritability to ~0.3 for each  
 121 trait and each selection variance.

|           | Bio 1             |                       |                       | Bio 12            |                       |                       |
|-----------|-------------------|-----------------------|-----------------------|-------------------|-----------------------|-----------------------|
|           | V <sub>SENM</sub> | 0.5 V <sub>SENM</sub> | 0.3 V <sub>SENM</sub> | V <sub>SENM</sub> | 0.5 V <sub>SENM</sub> | 0.3 V <sub>SENM</sub> |
| Campanula | 2                 | 1.5                   | 1.3                   | 45                | 37                    | 28                    |
| Dianthus  | 3                 | 2.7                   | 2.4                   | 54                | 39                    | 31                    |
| Festuca   | 2.7               | 2.3                   | 2                     | 32                | 20                    | 14                    |
| Primula   | 7.8               | 6.6                   | 5.8                   | 332               | 270                   | 227                   |

122

123

124 *Current and Future Climate data*

125 WorldClim (<http://www.worldclim.org> <sup>1</sup>) provides long-term monthly averages for precipitation  
126 and minimum, average and maximum temperature, and in addition a series of 19 bioclimatic  
127 variables directly derived from the monthly base maps at a resolution of 30 seconds (ca. 1 km)..  
128 We first downscaled the monthly base maps to a spatial resolution of 100m, in order to better  
129 represent topographic modification of micro-climate in our study area see <sup>2</sup>. In a second step we  
130 used these downscaled temperature and precipitation grids to generate maps of all 19 bioclimatic  
131 variables. In final step, we up-scaled these data to a 250m scale as a compromise between the  
132 area covered and the precision for local climate variability.

133 Future climate data were extracted from the Cordex data portal  
134 (<http://cordexesg.dmi.dk/esgf-web-fe/live>) and statistically downscaled from the original 11'  
135 resolution by (a) calculating differences (“deltas”) in temperature and precipitation values  
136 between hindcasted historical (mean 1950 – 1999) and forecasted future climatic parameters at  
137 the original spatial resolution; (b) spatially interpolating these differences to a resolution of 100 x  
138 100 m; (c) up-scaling the differences to the resolution of our bioclimatic base maps (250x250m);  
139 (d) adding these differences to the downscaled WorldClim maps of the same climatic variables  
140 <sup>2,3</sup>. Finally, we calculated 15-year means of these future time series for every tenth year (2013 -  
141 2027, 2023 – 2037, ... ) and therefrom derived the 19 bioclimatic variables in decadal time  
142 steps.

143 We used three different IPCC5 scenarios from the new Representative Concentration  
144 Pathways-family (RCP 2.6, RCP 4.5, RCP 8.5) <sup>4</sup>. These scenarios reflect different radiative  
145 forcing trajectories for the 21<sup>st</sup> century relative to pre-industrial conditions: The RCP2.6 scenario  
146 assumes that radiative forcing peaks at  $\sim 3 \text{ W m}^{-2}$  before 2100 and then declines and is therefore

147 referred to as mild scenario. In the intermediate scenario, RCP4.5, radiative forcing amounts to ~  
148  $4.5 \text{ W m}^{-2}$  at stabilization after 2100, while in the severe scenario, RCP8.5, radiative forcing  
149 continues to rise throughout the 21<sup>st</sup> century and reaches  $> 8.5 \text{ W m}^{-2}$  in 2100 <sup>4</sup>.

150 At the time of the downscaling, not all combinations of regional and global circulation  
151 models were available, so we chose one with a relatively smooth predicted time series for each  
152 RCP scenario, as compared to the other available options. Specifically, we used model runs  
153 from: (1) The Rossby Centre regional atmospheric model (RCA4), which was fed by the global  
154 circulation model EC-EARTH for the RCP 2.6 scenario generated by the Swedish  
155 Meteorological and Hydrological Institute (SMHI). (2) The HIRHAM5 model, which was fed by  
156 output from the global circulation model EC-EARTH for the RCP 4.5 scenario generated by the  
157 Danish Climate Centre (DMI). And (3), the Rossby Centre regional atmospheric model (RCA4),  
158 which was fed by output from the CNRM-CERFACS-CNRM-CM5 for the RCP 8.5 scenario  
159 generated by SMHI.

### 160 ***Geological data***

161 A fine-scaled map of substrate units was available for the Austrian Alps <sup>5</sup> which we used to  
162 compute the area of calcareous substrates within grid cells.

### 163 ***Vegetation plot data***

164 2386 localized plot data from subalpine and alpine non-forest vegetation of the Alps were  
165 compiled from published <sup>6</sup> and unpublished database (Supplementary Fig. 2). Data correspond to  
166 presence/ true-absence.

167

168 ***Life cycle: detailed demographic recursions***

169 We give below the exact recursions corresponding to the simulations for *Dianthus*. The  
 170 recursions for other species can be deduced from these recursions by adjusting for the longevity  
 171 of seeds (equations 1-4) in the seedbank as given in Supplementary Table 3.

172 The recursions for *Dianthus* are:

173  $N_{sb2}(t + 1) = (N_a(t)s_a + N_{prea}(t)s_{prea})Fs_{sb}(1 - g)$  1

174  $N_{sb3}(t + 1) = N_{sb2}(t)s_{sb}(1 - g)$  2

175  $N_{sb4}(t + 1) = N_{sb3}(t)s_{sb}(1 - g)$  3

176  $N_{sb5}(t + 1) = N_{sb4}(t)s_{sb}(1 - g)$  4

177  $N_{sdl}(t + 1) = \left( (N_a(t)s_a + N_{prea}(t)s_{prea})Fg + g \sum_{i=2}^5 N_{sbi}(t) + C_g(N_a(t)s_a + N_{prea}(t)s_{prea}) \right) c(t + 1)$  5

178  $N_{prea}(t + 1) = N_{sdl}(t)s_{sdl}$  6

179 (Including selection, for individuals in patch  $i$  with phenotype  $\mathbf{z}$  at time  $t$ :  $N_{prea,i,z}(t + 1) = N_{sdl,i,z}(t)s_{sdl}W_{i,t}(\mathbf{z})$ ,  
 180 where  $W_{i,t}(\mathbf{z})$  is given by equation 2 in Methods.)

181  $N_a(t + 1) = N_{prea}(t)s_{prea} + N_a(t)s_a$ , 7

182 where  $N_x(t)$  is the number of individuals in stage  $x$  at time  $t$  (*sbi*: seed having spent  $i - 1$  years in  
 183 the seedbank, *sdl*: seedlings, *prea*: preadults and *a*: adults),  $s_x$  the survival rate at stage  $x$ ,  $F$  the  
 184 fecundity of reproductive adults,  $g$  the germination rate,  $C_g$  the clonal fecundity and

185  $c(t + 1) = \frac{1}{1 + kc \left( (N_a(t)s_a + N_{prea}(t)s_{prea})Fg + g \sum_{i=2}^5 N_{sbi}(t) + N_a(t+1) + N_{prea}(t+1) + C_g(N_a(t)s_a + N_{prea}(t)s_{prea}) \right)}$ , 8

186 is the competition coefficient (Beverton-Holt function), where  $kc$  is the competitive weight of an  
 187 individual after germination. Since census occurs after seedbank survival and germination, seeds  
 188 produced in year  $t$  either have germinated, died, or start their 2nd year in the seedbank.

189 Data about demographic rates were taken from Hülber et al. <sup>7</sup> Table S1 and the relevant  
 190 numerical values are provided in Supplementary Table 3:



191 **Supplementary Table 3:** Demographic parameters for each species. Numerical values for  
 192 demographic recursions as given in equations 1-8. Details on how these values are calculated are  
 193 given below.

|                                                            | <i>Campanula</i> | <i>Dianthus</i> | <i>Festuca</i> | <i>Primula</i> |
|------------------------------------------------------------|------------------|-----------------|----------------|----------------|
| Fecundity ( $F$ )                                          | 173*0.557=96     | 19*0.506=9.6    | 27*0.115=3.1   | 70*0.524=36.7  |
| Seedbank survival rate ( $s_{sb}$ )                        | NA               | 0.398           | NA             | 0.63           |
| Germination rate ( $g$ )                                   | 0.165            | 0.165           | 0.06           | 0.165          |
| Seedling/pre-adult survival rate ( $s_{sd}$ ; $s_{prea}$ ) | 0.71             | 0.71            | 0.71           | 0.71           |
| Adult survival rate ( $s_a$ )                              | 0.7, 0.8, 0.9    | 0.7, 0.8, 0.9   | 0.7, 0.8, 0.9  | 0.7, 0.8, 0.9  |
| Cloning rate ( $C_g$ )                                     | 0.5              | 2.625           | 3.5            | 1              |

194 Fecundity (= Seed Yield \* Flowering frequency): We used the S values in Supplementary Table 3 from <sup>7</sup>  
 195 (referred as H-2016 hereafter).

196 Seedbank survival rate: We kept the lowest estimation for the number of years a seed can survive in the  
 197 seedbank (S values in H-2016). With this criterion, *Campanula* and *Festuca* have no seedbank. For  
 198 *Dianthus* and *Primula* it is calculated with the rule that 1% of seeds in a given cohort survive to the  
 199 estimated persistence in the seedbank, thus solving for  $l_x = 0.01$ , with  $l_x = s_{sb}^{(x-1)}$  where  $s_{sb}$  is the yearly  
 200 survival rate in the seedbank (assumed constant) and  $x$  the maximum years in the seedbank (5 for  
 201 *Dianthus*, 7 for *Primula*). For *Primula*, we assumed that seed can stay a maximum of 7 years in the  
 202 seedbank (instead of 10 as proposed in H-2016) to limit the memory required for the simulations  
 203 (individuals in the seedbank need to be stored in memory) to a computationally manageable amount.

204 Germination rate: We used the S values in H-2016. These values correspond to measured germination  
 205 rates times an estimate of the survival rate in the first year after germination from <sup>8</sup>, which is here equal to  
 206 0.4.

207 Seedling/pre-adult survival rate: values from H-2016, correspond to the probability that an established  
 208 seed survives to adulthood. Here we consider two post-establishment stages (seedlings and preadults, i.e.  
 209 maturity is reached after 2 years). The values in Supplementary Table 3 satisfy  $s_j^2 = 0.5$ .

210 Adult survival rate: We performed a sensitivity analysis on this parameter because no precise estimates  
 211 were available for the focal species. We considered 3 values (0.7, 0.8 and 0.9) according to estimated  
 212 adult survival rates in species with similar ecology <sup>9-11</sup>.

213 Clonal rate: Correspond to the cloning rates in H-2016 (median of the estimated values) minus 1 to  
 214 remove the focal individual. We used the median of the range estimated as 1) the range of estimated  
 215 values was wider for this parameter 2) the lowest estimated values were similar for most species while the  
 216 maximal values were substantially different. Using the median of the estimated range allows to use a  
 217 reasonable value, i.e. capturing species specificity, given the estimated ranges.

218

219 *Density dependent regulation:*

220 **Supplementary Table 4:** Competition coefficients  $kc$  used in the simulations. Values of the  
221 competition coefficient as used in equation 8 above.

|                  | Adult Survival |         |        |
|------------------|----------------|---------|--------|
|                  | 0.7            | 0.8     | 0.9    |
| <i>Campanula</i> | 0.0014         | 0.002   | 0.0045 |
| <i>Dianthus</i>  | 0.0037         | 0.0060  | 0.013  |
| <i>Festuca</i>   | 0.00025        | 0.00041 | 0.0009 |
| <i>Primula</i>   | 0.0028         | 0.0044  | 0.009  |

222

223 *Dispersal*

224 We used the dispersal kernels from Dullinger et al. <sup>2</sup>. All selected species are polychorous, so  
225 that the dispersal kernels are composed of a wind dispersal kernel (based on a mechanistic  
226 model) and an animal dispersal kernel (based on random-walk simulations and measured seed  
227 detachment rate from chamois fur). We used the high distance kernels as proposed by Dullinger  
228 et al. <sup>2</sup>, where the animal dispersal kernels, with the more fat-tailed distribution, account for 5%  
229 of the total dispersal kernel.

230

231 **Supplementary References**

- 232 1 Hijmans, R. J., Cameron, S. E., Parra, J. L., Jones, P. G. & Jarvis, A. Very high resolution  
233 interpolated climate surfaces for global land areas. *International journal of climatology*  
234 **25**, 1965-1978 (2005).
- 235 2 Dullinger, S. *et al.* Extinction debt of high-mountain plants under twenty-first-century  
236 climate change. *Nature Climate Change* **2**, 619-622, doi:10.1038/nclimate1514 (2012).
- 237 3 Zimmermann, N. E. *et al.* Climatic extremes improve predictions of spatial patterns of  
238 tree species. *Proceedings of the National Academy of Sciences* **106**, 19723-19728 (2009).
- 239 4 Moss, R. H. *et al.* The next generation of scenarios for climate change research and  
240 assessment. *Nature* **463**, 747-756 (2010).
- 241 5 Bayer, I. & Pavlik, W. in *Proceedings of the 6th European Congress on Regional*  
242 *Geoscientific Cartography and Information Systems (EUREGEO), Earth and Man.* 109-  
243 111.
- 244 6 Willner, W., Berg, C. & Heiselmayer, P. Austrian vegetation database. *Biodivers Ecol* **4**,  
245 333 (2012).
- 246 7 Hülber, K. *et al.* Uncertainty in predicting range dynamics of endemic alpine plants under  
247 climate warming. *Global change biology* **22**, 2608-2619 (2016).
- 248 8 Forbis, T. A. Seedling demography in an alpine ecosystem. *American Journal of Botany*  
249 **90**, 1197-1206, doi:10.3732/ajb.90.8.1197 (2003).
- 250 9 Wepler, T., Stoll, P. & Stöcklin, J. The relative importance of sexual and clonal  
251 reproduction for population growth in the long-lived alpine plant *Geum reptans*. *Journal*  
252 *of Ecology* **94**, 869-879 (2006).
- 253 10 Kuss, P., Rees, M., Ægisdóttir, H. H., Ellner, S. P. & Stöcklin, J. Evolutionary  
254 demography of long-lived monocarpic perennials: a time-lagged integral projection  
255 model. *Journal of Ecology* **96**, 821-832 (2008).
- 256 11 Gonzalo-Turpin, H. & Hazard, L. Local adaptation occurs along altitudinal gradient  
257 despite the existence of gene flow in the alpine plant species *Festuca eskia*. *Journal of*  
258 *Ecology* **97**, 742-751 (2009).

259

260
